# Supplementary material for: Two Strains of Lactobacilli Effectively Decrease the Colonization of VRE in a Mouse Model
Source: Front Cell Infect Microbiol. 2019 Jan 30;9:6. doi: 10.3389/fcimb.2019.00006 (PMC6363661; doi:10.3389/fcimb.2019.00006)
Supplement: Supplementary file 5 [file Table_1.xlsx]

## Sheet: Sheet1
Table S1 Acid and bile salt tolerance assays of Lactobacillus candidates
NO.	Strain	The number of inoculum (CFU)	Viable count (CFU)
			PH=2.0	0.3% Bile Salt
1	Y74	1×107	3.6×106	2.1×108
2	Y13	1×106	3.5×104	5.3×105
3	Y20	1×107	5.2×106	5.9×107
4	HT70-2	1×107	＜105	N/A
5	HT75-2	1×107	＜105	N/A
6	HT91-1	1×106	＜104	N/A
7	HT92-1	1×106	＜104	N/A
8	HT104-2	1×107	2.3×105	8.3×106
9	HT109	1×107	6.8×106	3.8×107
10	HT115-5	1×107	7.9×105	3.9×108
11	HT117-2	1×107	＜105	N/A
12	HT121	1×107	3.5×106	3.6×107
13	HT130-1	1×107	1.6×105	7.3×106
14	HT130-2	1×106	＜104	N/A
15	HT131-1	1×107	3.3×105	7.8×106
16	HT135-2	1×107	＜105	N/A
17	HT137-1	1×107	3.1×105	1.5×106
18	HT143-2	1×106	＜104	N/A
19	HT155-2	1×107	6.9×105	1.4×108
20	HT172-2	1×107	7.7×105	3.1×107
