# Supplementary material for: Two Strains of Lactobacilli Effectively Decrease the Colonization of VRE in a Mouse Model
Source: Front Cell Infect Microbiol. 2019 Jan 30;9:6. doi: 10.3389/fcimb.2019.00006 (PMC6363661; doi:10.3389/fcimb.2019.00006)
Supplement: Supplementary file 6 [file Table_2.xlsx]

## Sheet: Sheet1
Table S2. List of DEGs in FMT/PBS
GeneID	geneLength	Means-control	Means-fmt	log2Ratio(fmt/control)	Up-Down-Regulation(fmt/control)	Probability	Symbol	Description
73385	3863	0.01	3.94333	8.62327	Up	1	Fam177a	family with sequence similarity 177, member A
66438	439	0.01	1.03333	6.69116	Up	1	Hamp2	hepcidin antimicrobial peptide 2
627914	4538	0.01	1.01	6.65821	Up	0.996392	Gm14430	predicted gene 14430
319161	366	0.166667	1.93667	3.53854	Up	0.975533	Hist1h4n	histone cluster 1, H4n
57738	3912	0.393333	3.41667	3.11877	Up	0.996108	Slc15a2	solute carrier family 15 (H+/peptide transporter), member 2
14622	1704	0.38	1.91667	2.33453	Up	0.980375	Gjb5	gap junction protein, beta 5
11752	1892	5.42667	23.5533	2.11779	Up	0.993601	Anxa8	annexin A8
20730	422	41.75	175.657	2.07291	Up	1	Spink1	serine peptidase inhibitor, Kazal type 1
71578	617	37.85	155.903	2.04229	Up	0.995991	Sval1	seminal vesicle antigen-like 1
71754	1129	0.846667	3.36333	1.99003	Up	0.973587	Cyp2d40	cytochrome P450, family 2, subfamily d, polypeptide 40
381043	520	0.656667	2.42333	1.88376	Up	0.991179	Gm933	predicted gene 933
105886299	644	0.426667	1.56333	1.87344	Up	0.865515	Apoc4-apoc2	Apoc4-Apoc2 readthrough
219033	695	473.71	1669.41	1.81726	Up	0.992926	Ang4	angiogenin, ribonuclease A family, member 4
623503	261	0.316667	1.11	1.80952	Up	0.885438	Prlh	prolactin releasing hormone
15945	1120	2.95667	10.2667	1.79592	Up	0.999981	Cxcl10	chemokine (C-X-C motif) ligand 10
15077	664	2.35667	8.03333	1.76925	Up	0.945551	Hist2h3c1	histone cluster 2, H3c1
20739	8405	0.353333	1.2	1.76393	Up	0.91181	Spta1	spectrin alpha, erythrocytic 1
57263	718	444.933	1504.11	1.75725	Up	1	Retnlb	resistin like beta
111241	1577	0.413333	1.33333	1.68966	Up	0.889392	Hmga1-rs1	high mobility group AT-hook I, related sequence 1
18947	1593	10.9267	35.0067	1.67978	Up	0.983096	Pnliprp2	pancreatic lipase-related protein 2
13105	1651	5.60667	17.9167	1.67609	Up	0.997034	Cyp2d9	cytochrome P450, family 2, subfamily d, polypeptide 9
66289	803	2722.38	8417.46	1.62852	Up	0.990504	Mptx1	mucosal pentraxin 1
654824	921	6.61333	19.2133	1.53866	Up	0.994784	Ankrd37	ankyrin repeat domain 37
13614	2143	5.38333	15.2167	1.49908	Up	0.992889	Edn1	endothelin 1
15433	2483	0.676667	1.9	1.48948	Up	0.958454	Hoxd13	homeobox D13
17857	3218	2.49	6.99	1.48915	Up	0.99626	Mx1	MX dynamin-like GTPase 1
244853	3173	5.96333	16.6733	1.48335	Up	0.985084	Nxpe4	neurexophilin and PC-esterase domain family, member 4
68416	557	239.447	663.033	1.46938	Up	1	Sycn	syncollin
56643	3123	10.7733	29.6567	1.46089	Up	0.994648	Slc15a1	solute carrier family 15 (oligopeptide transporter), member 1
23959	3580	7.12	19.55	1.45722	Up	0.995123	Nt5e	5' nucleotidase, ecto
20293	537	0.493333	1.35333	1.45588	Up	0.94852	Ccl12	chemokine (C-C motif) ligand 12
13884	1850	0.493333	1.34667	1.44876	Up	0.887706	Ces1c	carboxylesterase 1C
14590	1340	50.0867	134.593	1.42611	Up	0.999802	Ggh	gamma-glutamyl hydrolase
12962	798.95	1.96667	5.28	1.42479	Up	0.972866	Crybb3	crystallin, beta B3
11472	3091	0.443333	1.18667	1.42045	Up	0.96018	Actn2	actinin alpha 2
18787	3024	1.48333	3.95667	1.41544	Up	0.951828	Serpine1	serine (or cysteine) peptidase inhibitor, clade E, member 1
319155	375	0.383333	1.02	1.4119	Up	0.903518	Hist1h4c	histone cluster 1, H4c
11833	1483.69	163.48	433.57	1.40715	Up	1	Aqp8	aquaporin 8
12879	1838	1.57333	4.08	1.37474	Up	0.981194	Cys1	cystin 1
12096	496	0.936667	2.42333	1.37139	Up	0.92834	Bglap	bone gamma carboxyglutamate protein
380997	1624	6.13	15.6067	1.3482	Up	0.97673	Cyp2d12	cytochrome P450, family 2, subfamily d, polypeptide 12
332110	1961	0.586667	1.49333	1.34792	Up	0.977569	Mapk15	mitogen-activated protein kinase 15
69809	1318	0.55	1.38667	1.33412	Up	0.97344	1810046K07Rik	RIKEN cDNA 1810046K07 gene
20472	2108	1.05	2.63667	1.32833	Up	0.895847	Six2	sine oculis-related homeobox 2
14219	2418	10.8367	27.1667	1.32592	Up	0.972083	Ctgf	connective tissue growth factor
106585	8991	2.22333	5.51667	1.31107	Up	0.987035	Ankrd12	ankyrin repeat domain 12
13170	1678	17.71	43.7933	1.30615	Up	0.995275	Dbp	D site albumin promoter binding protein
433247	1778	11.5933	28.5867	1.30205	Up	0.98823	Cyp2c68	cytochrome P450, family 2, subfamily c, polypeptide 68
18628	5996.25	1.99667	4.91333	1.29911	Up	0.98347	Per3	period circadian clock 3
654812	2062	4.92333	11.7133	1.25044	Up	0.930692	Angptl7	angiopoietin-like 7
223706	1622	58.3067	137.463	1.23731	Up	0.997413	Cyp2d34	cytochrome P450, family 2, subfamily d, polypeptide 34
66938	2142.05	12.2533	28.82	1.2339	Up	0.983531	Sh3d21	SH3 domain containing 21
12587	583	1.67333	3.90667	1.22321	Up	0.950185	Mia	melanoma inhibitory activity
667373	2217.39	66.1667	153.23	1.21152	Up	1	Ifit1bl1	interferon induced protein with tetratricpeptide repeats 1B like 1
68468	960	3.89	8.97333	1.20587	Up	0.930588	Ly6g6c	lymphocyte antigen 6 complex, locus G6C
102022	1964	50.2767	115.707	1.20251	Up	0.995526	Ces2a	carboxylesterase 2A
21818	4144	55.0067	125.473	1.1897	Up	0.975632	Tgm3	transglutaminase 3, E polypeptide
19660	672	14.5833	32.7233	1.166	Up	0.97761	Rbp2	retinol binding protein 2, cellular
15957	2638	21.5233	48.2733	1.16532	Up	1	Ifit1	interferon-induced protein with tetratricopeptide repeats 1
100861755	1196	0.543333	1.21	1.1551	Up	0.896873	Gm21190	predicted gene, 21190
546644	922	12.8767	28.63	1.15277	Up	0.974989	Ly6g	lymphocyte antigen 6 complex, locus G
11639	4894	2.99333	6.6	1.14071	Up	0.974014	Ak4	adenylate kinase 4
80879	2481	2.22333	4.89	1.13711	Up	0.967621	Slc16a3	solute carrier family 16 (monocarboxylic acid transporters), member 3
63828	1298.22	0.493333	1.08	1.1304	Up	0.952843	Fn3k	fructosamine 3 kinase
545123	1590	1.47667	3.19	1.11121	Up	0.96705	Cyp2d11	cytochrome P450, family 2, subfamily d, polypeptide 11
23844	2935	2300.56	4931.83	1.10014	Up	0.988405	Clca1	chloride channel accessory 1
74562	6105	0.556667	1.19	1.09608	Up	0.887906	Fer1l4	fer-1-like 4 (C. elegans)
215384	7957	560.537	1193.42	1.09022	Up	0.989964	Fcgbp	Fc fragment of IgG binding protein
75141	2810	5.91333	12.5533	1.08603	Up	0.973167	Rasd2	RASD family, member 2
449000	2514.06	0.796667	1.68	1.07641	Up	0.973769	Zfp960	zinc finger protein 960
21685	4218.02	11.0133	23.1333	1.07072	Up	0.995804	Tef	thyrotroph embryonic factor
18627	5845	1.93	4.04667	1.06813	Up	0.973414	Per2	period circadian clock 2
213393	1314	2.31667	4.84	1.06296	Up	0.975677	8430408G22Rik	RIKEN cDNA 8430408G22 gene
100503041	3927	2.82667	5.85667	1.05098	Up	0.974534	Pdzd7	PDZ domain containing 7
13101	1681	10.7333	22.23	1.05041	Up	0.975158	Cyp2d10	cytochrome P450, family 2, subfamily d, polypeptide 10
109660	919	0.68	1.40667	1.04867	Up	0.887919	Ctrl	chymotrypsin-like
83924	2996	7.17667	14.6867	1.03312	Up	0.983378	Gpr137b	G protein-coupled receptor 137B
66695	2362	7.30333	14.8833	1.02707	Up	0.982326	Aspn	asporin
320712	4058.87	1.42	2.89	1.02518	Up	0.979846	Abi3bp	ABI gene family, member 3 (NESH) binding protein
212989	1971	7.55333	15.3333	1.02149	Up	0.973944	Best2	bestrophin 2
58185	3785	8.42333	17.0967	1.02125	Up	0.996483	Rsad2	radical S-adenosyl methionine domain containing 2
15398	1318	3.99333	8.09333	1.01914	Up	0.955072	Hoxa13	homeobox A13
17229	1088	0.5	1.01333	1.01911	Up	0.88545	Tpsb2	tryptase beta 2
71860	2201	0.536667	1.08667	1.01781	Up	0.973321	Cfap52	cilia and flagella associated protein 52
210853	2659	0.873333	1.76667	1.01643	Up	0.967871	Zfp947	zinc finger protein 947
76722	1516	0.906667	1.82667	1.01057	Up	0.971216	Ckmt2	creatine kinase, mitochondrial 2
16429	1149	19.6033	39.2167	1.00037	Up	0.976856	Itln1	intelectin 1 (galactofuranose binding)
17393	1068	1.86	0.93	-1	Down	0.938206	Mmp7	matrix metallopeptidase 7
15000	786	6.42667	3.21	-1.0015	Down	0.969707	H2-DMb2	histocompatibility 2, class II, locus Mb2
18405	779	2.18667	1.08667	-1.00882	Down	0.892905	Orm1	orosomucoid 1
107753	607	10.5667	5.25	-1.00913	Down	0.98825	Lgals2	lectin, galactose-binding, soluble 2
17218	3434.87	14.55	7.22	-1.01095	Down	0.996512	Mcm5	minichromosome maintenance complex component 5
114714	2954	1.21	0.6	-1.01197	Down	0.996671	Rad51c	RAD51 paralog C
27221	3308	5.51333	2.73	-1.01402	Down	0.992666	Chaf1a	chromatin assembly factor 1, subunit A (p150)
272347	3242.29	1.07333	0.53	-1.01803	Down	0.988561	Zfp398	zinc finger protein 398
110033	2086	14.7367	7.25333	-1.02269	Down	0.996653	Kif22	kinesin family member 22
12350	1537	61.7	30.3333	-1.02437	Down	0.973057	Car3	carbonic anhydrase 3
233406	3015.91	13.7933	6.78	-1.02461	Down	0.99645	Prc1	protein regulator of cytokinesis 1
237636	4571	1.19667	0.586667	-1.02841	Down	0.940418	Npc1l1	NPC1-like 1
12615	1429.07	24.6167	12.0033	-1.0362	Down	0.996092	Cenpa	centromere protein A
406219	1826	2.19667	1.07	-1.03771	Down	0.984101	Krt83	keratin 87
76843	4221	2.22	1.08	-1.03953	Down	0.986783	Dtl	denticleless E3 ubiquitin protein ligase
236539	1871	15.5733	7.54667	-1.04517	Down	0.992204	Phgdh	3-phosphoglycerate dehydrogenase
19183	984	1.93333	0.936667	-1.04548	Down	0.981587	Psmc3ip	proteasome (prosome, macropain) 26S subunit, ATPase 3, interacting protein
53314	904	1.17667	0.57	-1.04567	Down	0.945602	Batf	basic leucine zipper transcription factor, ATF-like
102920	3624	1.16333	0.563333	-1.0462	Down	0.991364	Cenpi	centromere protein I
381204	2238	83.91	40.6067	-1.04713	Down	0.992497	Naaladl1	N-acetylated alpha-linked acidic dipeptidase-like 1
78354	881	139.53	67.2833	-1.05225	Down	0.99198	2210407C18Rik	RIKEN cDNA 2210407C18 gene
208084	3680	2.29	1.10333	-1.05348	Down	0.984573	Pif1	PIF1 5'-to-3' DNA helicase
21664	1953	28.43	13.6967	-1.05359	Down	0.999578	Phlda1	pleckstrin homology like domain, family A, member 1
217216	2543	2.22333	1.06667	-1.05961	Down	0.98279	BC030867	cDNA sequence BC030867
16176	1348	1.12667	0.54	-1.06103	Down	0.945645	Il1b	interleukin 1 beta
218977	2966	4.65333	2.23	-1.06122	Down	0.993969	Dlgap5	discs, large (Drosophila) homolog-associated protein 5
319520	2427	1.24	0.593333	-1.06343	Down	0.987689	Dusp4	dual specificity phosphatase 4
15200	2392	15.9767	7.63333	-1.06558	Down	0.995658	Hbegf	heparin-binding EGF-like growth factor
22268	1769	3.74333	1.78667	-1.06705	Down	0.98861	Upk1b	uroplakin 1B
12021	5448	1.28667	0.613333	-1.0689	Down	0.992766	Bard1	BRCA1 associated RING domain 1
66929	1599	9.4	4.46	-1.07562	Down	0.990175	Asf1b	anti-silencing function 1B histone chaperone
110257	587	32.71	15.5133	-1.07622	Down	0.984759	Hba-a2	hemoglobin alpha, adult chain 2
21990	3858.5	10.19	4.83	-1.07706	Down	0.995682	Tph1	tryptophan hydroxylase 1
227231	5585	2.04	0.966667	-1.07748	Down	0.984615	Cps1	carbamoyl-phosphate synthetase 1
11799	1279.38	43.03	20.39	-1.07748	Down	0.997679	Birc5	baculoviral IAP repeat-containing 5
22036	2697	2.46333	1.16667	-1.07822	Down	0.984499	Traip	TRAF-interacting protein
110749	1913	6.00667	2.84333	-1.07898	Down	0.995183	Chaf1b	chromatin assembly factor 1, subunit B (p60)
67849	1906	6.03	2.85333	-1.07951	Down	0.994635	Cdca5	cell division cycle associated 5
68298	4527	18.0133	8.51333	-1.08127	Down	0.992569	Ncapd2	non-SMC condensin I complex, subunit D2
68014	2784	3.05	1.44	-1.08274	Down	0.988323	Zwilch	zwilch kinetochore protein
108912	3568	3.73333	1.75333	-1.09036	Down	0.988166	Cdca2	cell division cycle associated 2
21877	1389	26.9633	12.6533	-1.09148	Down	0.995403	Tk1	thymidine kinase 1
195733	3487	1.47333	0.69	-1.09442	Down	0.984436	Grhl1	grainyhead-like 1 (Drosophila)
57875	1916	4.16333	1.94667	-1.09673	Down	0.984329	Angptl4	angiopoietin-like 4
17865	3702	3.43	1.6	-1.10014	Down	0.993043	Mybl2	myeloblastosis oncogene-like 2
20393	2474.14	114.7	53.44	-1.10187	Down	1	Sgk1	serum/glucocorticoid regulated kinase 1
116939	4649	2.36333	1.1	-1.10332	Down	0.974156	Pnpla3	patatin-like phospholipase domain containing 3
108000	11130	1.82	0.846667	-1.10407	Down	0.987827	Cenpf	centromere protein F
17215	2886	13.7933	6.41667	-1.10408	Down	0.996488	Mcm3	minichromosome maintenance complex component 3
12532	1945	3.68667	1.71333	-1.10551	Down	0.98803	Cdc25c	cell division cycle 25C
13605	4002	3.94333	1.82333	-1.11284	Down	0.987063	Ect2	ect2 oncogene
70458	1357	3.78667	1.75	-1.11357	Down	0.99659	2610318N02Rik	RIKEN cDNA 2610318N02 gene
21785	571	1.45	0.67	-1.11382	Down	0.981206	Tff2	trefoil factor 2 (spasmolytic protein 1)
72787	2576	4.91333	2.27	-1.11401	Down	0.994614	Ndc1	NDC1 transmembrane nucleoporin
27273	3453	14.8	6.83333	-1.11494	Down	0.995234	Pdk4	pyruvate dehydrogenase kinase, isoenzyme 4
83490	2615	1.76333	0.813333	-1.11639	Down	0.984525	Pik3ap1	phosphoinositide-3-kinase adaptor protein 1
14555	2809	35.41	16.33	-1.11663	Down	0.995968	Gpd1	glycerol-3-phosphate dehydrogenase 1 (soluble)
319581	2855	1.04667	0.48	-1.1247	Down	0.982761	Xkr5	X-linked Kx blood group related 5
70466	3154	6.31667	2.89667	-1.12477	Down	0.988907	Ckap2l	cytoskeleton associated protein 2-like
20249	4844	59.7733	27.4067	-1.12498	Down	0.985073	Scd1	stearoyl-Coenzyme A desaturase 1
20135	2199	12.6133	5.78333	-1.12498	Down	0.995005	Rrm2	ribonucleotide reductase M2
12449	3099	8.12333	3.72	-1.12677	Down	0.994435	Ccnf	cyclin F
233549	1787	8.18333	3.74667	-1.12708	Down	0.981507	Mogat2	monoacylglycerol O-acyltransferase 2
80986	2601	4.22	1.92667	-1.13114	Down	0.994721	Ckap2	cytoskeleton associated protein 2
11647	2524	2.73667	1.24667	-1.13434	Down	0.987959	Alpl	alkaline phosphatase, liver/bone/kidney
16580	2627	1.98	0.9	-1.1375	Down	0.988604	Kifc5b	kinesin family member C5B
18973	7167	1.45333	0.66	-1.13883	Down	0.992156	Pole	polymerase (DNA directed), epsilon
66570	1218	7.44	3.37667	-1.1397	Down	0.991729	Cenpm	centromere protein M
69888	1630	3.12333	1.41667	-1.14059	Down	0.969862	Cyp2c66	cytochrome P450, family 2, subfamily c, polypeptide 66
15270	1414	67.57	30.5833	-1.14364	Down	1	H2afx	H2A histone family, member X
107995	1793	32.4033	14.6467	-1.14557	Down	0.9955	Cdc20	cell division cycle 20
13836	3948	16.3633	7.38	-1.14877	Down	0.994975	Epha2	Eph receptor A2
208628	6961	1.04	0.466667	-1.15612	Down	0.984123	Kntc1	kinetochore associated 1
21335	2649	14.6067	6.55	-1.15706	Down	0.996409	Tacc3	transforming, acidic coiled-coil containing protein 3
26934	2956.58	17.93	8.03667	-1.15771	Down	0.998031	Racgap1	Rac GTPase-activating protein 1
21973	5217	17.07	7.63	-1.16171	Down	0.999698	Top2a	topoisomerase (DNA) II alpha
14235	4391	6.45667	2.88333	-1.16305	Down	0.995352	Foxm1	forkhead box M1
12534	2860	10.9033	4.86333	-1.16475	Down	0.996011	Cdk1	cyclin-dependent kinase 1
99709	2997	4.85333	2.15667	-1.17017	Down	0.979224	Clca4b	chloride channel accessory 4B
16571	4712	3.91	1.73333	-1.17362	Down	0.996727	Kif4	kinesin family member 4
100041230	405	2.01333	0.89	-1.17771	Down	0.808007	Hist1h4m	histone cluster 1, H4m
18088	2049	1.52333	0.673333	-1.17784	Down	0.987462	Nkx2-2	NK2 homeobox 2
76905	1372	6.52	2.87667	-1.18047	Down	0.988573	Lrg1	leucine-rich alpha-2-glycoprotein 1
17436	3257	33.0067	14.55	-1.18174	Down	0.987373	Me1	malic enzyme 1, NADP(+)-dependent, cytosolic
215387	2702	8.81667	3.88333	-1.18294	Down	0.995552	Ncaph	non-SMC condensin I complex, subunit H
105988	6630	1.97	0.866667	-1.18465	Down	0.983885	Espl1	extra spindle pole bodies 1, separase
20460	4836.1	1.62	0.71	-1.1901	Down	0.989741	Stil	Scl/Tal1 interrupting locus
271887	2319	1.08	0.47	-1.2003	Down	0.981363	Rbbp8nl	RBBP8 N-terminal like
19361	2138	4.83	2.1	-1.20163	Down	0.995777	Rad51	RAD51 recombinase
12428	2827	36.6367	15.92	-1.20245	Down	0.999509	Ccna2	cyclin A2
12236	3669	7.27333	3.14333	-1.21032	Down	0.996334	Bub1b	BUB1B, mitotic checkpoint serine/threonine kinase
74107	2565.66	4.7	2.02333	-1.21593	Down	0.987543	Cep55	centrosomal protein 55
16005	2111	1.12333	0.483333	-1.2167	Down	0.971529	Igfals	insulin-like growth factor binding protein, acid labile subunit
68612	931	104.173	44.77	-1.21838	Down	1	Ube2c	ubiquitin-conjugating enzyme E2C
72080	3305	3.12667	1.34333	-1.21881	Down	0.985645	Sapcd2	suppressor APC domain containing 2
14793	1488	43.4667	18.5867	-1.22564	Down	0.990419	Cdca3	cell division cycle associated 3
73804	2840	5.38	2.3	-1.22597	Down	0.993691	Kif2c	kinesin family member 2C
72415	3609	2.87	1.22667	-1.22631	Down	0.995399	Sgol1	shugoshin-like 1 (S. pombe)
100502766	2330	10.11	4.32	-1.22668	Down	0.996826	Kifc1	kinesin family member C1
99010	1920	74.2367	31.68	-1.22856	Down	0.998078	Lpcat4	lysophosphatidylcholine acyltransferase 4
12702	2742	11.6533	4.95333	-1.23427	Down	0.987255	Socs3	suppressor of cytokine signaling 3
107221	1393	31.1933	13.2367	-1.2367	Down	0.99271	Ffar4	free fatty acid receptor 4
20419	2244	3.49667	1.48333	-1.23714	Down	0.993004	Shcbp1	Shc SH2-domain binding protein 1
14584	2986	2.36667	1.00333	-1.23806	Down	0.984839	Gfpt2	glutamine fructose-6-phosphate transaminase 2
236930	4198	1.11667	0.473333	-1.23827	Down	0.979667	Ercc6l	excision repair cross-complementing rodent repair deficiency complementation group 6 like
19277	4096	1.95333	0.823333	-1.24639	Down	0.992106	Ptpro	protein tyrosine phosphatase, receptor type, O
52033	1663	13.19	5.54	-1.25149	Down	0.996885	Pbk	PDZ binding kinase
52276	1626	23.16	9.72	-1.25261	Down	0.991838	Cdca8	cell division cycle associated 8
72391	773	12.67	5.31667	-1.25282	Down	0.995321	Cdkn3	cyclin-dependent kinase inhibitor 3
268697	2316	13.5967	5.69667	-1.25506	Down	0.996121	Ccnb1	cyclin B1
574437	1636	2.14333	0.886667	-1.27339	Down	0.950403	Xlr3b	X-linked lymphocyte-regulated 3B
11925	1540	1.96667	0.806667	-1.28571	Down	0.990121	Neurog3	neurogenin 3
217653	4038	1.52333	0.623333	-1.28916	Down	0.989318	Mis18bp1	MIS18 binding protein 1
29870	2737	6.05667	2.47	-1.29401	Down	0.995946	Gtse1	G two S phase expressed protein 1
78733	2280	4.37333	1.76333	-1.31043	Down	0.995544	Troap	trophinin associated protein
108961	3705	6.33333	2.51333	-1.33336	Down	0.994925	E2f8	E2F transcription factor 8
12442	1541	29.32	11.5867	-1.33942	Down	1	Ccnb2	cyclin B2
22361	2416	11.82	4.66333	-1.3418	Down	0.995054	Vnn1	vanin 1
69885	1270	2.28	0.893333	-1.35176	Down	0.987072	Aunip	aurora kinase A and ninein interacting protein
20877	1981	15.0867	5.88667	-1.35775	Down	0.992023	Aurkb	aurora kinase B
20878	1897	16.8733	6.58	-1.35859	Down	0.999335	Aurka	aurora kinase A
68026	2387	30.5267	11.89	-1.36032	Down	0.992474	2810417H13Rik	RIKEN cDNA 2810417H13 gene
106407	1544	219.143	85.11	-1.36447	Down	1	Slc51a	solute carrier family 51, alpha subunit
404710	5676	5.26	2.04	-1.36649	Down	0.994977	Iqgap3	IQ motif containing GTPase activating protein 3
66468	2605	1.44	0.553333	-1.37985	Down	0.994934	Ska1	spindle and kinetochore associated complex subunit 1
224093	3075	13.0267	5.00333	-1.38051	Down	0.997705	Fam43a	family with sequence similarity 43, member A
14049	2283	1.11667	0.426667	-1.38802	Down	0.995148	Eya2	EYA transcriptional coactivator and phosphatase 2
18005	3218	9.95667	3.80333	-1.3884	Down	0.996241	Nek2	NIMA (never in mitosis gene a)-related expressed kinase 2
668526	425	2.17667	0.826667	-1.39674	Down	0.973946	Scgb2b17	secretoglobin, family 2B, member 17
624439	425	2.17667	0.826667	-1.39674	Down	0.973946	Scgb2b15	secretoglobin, family 2B, member 15
13406	2760	1.85	0.693333	-1.4159	Down	0.992662	Dmp1	dentin matrix protein 1
232975	3609	3.01333	1.11667	-1.43216	Down	0.984821	Atp1a3	ATPase, Na+/K+ transporting, alpha 3 polypeptide
70218	3345	4.74667	1.75333	-1.43681	Down	0.996873	Kif18b	kinesin family member 18B
18489	759	522.467	192.83	-1.43801	Down	0.988247	Reg3b	regenerating islet-derived 3 beta
16790	3439	16.78	6.04667	-1.47253	Down	0.987169	Anpep	alanyl (membrane) aminopeptidase
218581	2530	1.96	0.696667	-1.49231	Down	0.995781	Depdc1b	DEP domain containing 1B
17279	2914	9.58333	3.28667	-1.5439	Down	0.998753	Melk	maternal embryonic leucine zipper kinase
57264	618.45	21.2533	7.15667	-1.57033	Down	0.985068	Retn	resistin
14313	2659.02	5.8	1.94667	-1.57505	Down	0.992766	Fst	follistatin
12869	383	2.44667	0.82	-1.57712	Down	0.975057	Cox8b	cytochrome c oxidase subunit VIIIb
53324	2551	1.38667	0.453333	-1.61298	Down	0.99594	Nptx2	neuronal pentraxin 2
12738	3079	116.493	36.3433	-1.68048	Down	1	Cldn2	claudin 2
67715	1257	1.13333	0.35	-1.69515	Down	0.928702	2010106E10Rik	RIKEN cDNA 2010106E10 gene
19695	790	210.18	64.6367	-1.7012	Down	0.994983	Reg3g	regenerating islet-derived 3 gamma
19694	837	4.08667	1.24333	-1.71671	Down	0.98703	Reg3a	regenerating islet-derived 3 alpha
14283	1705	8.46333	2.54333	-1.73451	Down	0.995217	Fosl1	fos-like antigen 1
56419	3516	1.20667	0.356667	-1.75838	Down	0.995325	Diaph3	diaphanous related formin 3
232174	4700	1.39667	0.41	-1.76829	Down	0.99258	Cyp26b1	cytochrome P450, family 26, subfamily b, polypeptide 1
13874	4136	4.83333	1.41333	-1.77392	Down	0.995973	Ereg	epiregulin
246747	665	2.92333	0.85	-1.78208	Down	0.980988	Adig	adipogenin
77037	992	2.95667	0.856667	-1.78717	Down	0.984797	Mrap	melanocortin 2 receptor accessory protein
103968	1879	4.52333	1.27667	-1.825	Down	0.982928	Plin1	perilipin 1
105940408	1630.32	2.38	0.666667	-1.83592	Down	0.988101	Synj2bp-cox16	Synj2bp-cox16 readthrough
18126	3975.79	4.88667	1.34333	-1.86303	Down	0.986462	Nos2	nitric oxide synthase 2, inducible
213002	541	1.04667	0.286667	-1.86836	Down	0.988061	Ifitm6	interferon induced transmembrane protein 6
11537	925.26	101.467	26.2067	-1.953	Down	0.991168	Cfd	complement factor D (adipsin)
319942	2636	1.25333	0.3	-2.06274	Down	0.981924	A530016L24Rik	RIKEN cDNA A530016L24 gene
17392	1801	1.31333	0.313333	-2.06746	Down	0.995363	Mmp3	matrix metallopeptidase 3
75697	1348	21.9567	5.22667	-2.0707	Down	0.991848	C2cd4b	C2 calcium-dependent domain containing 4B
217698	1518	1.96667	0.463333	-2.08563	Down	0.995344	Acot5	acyl-CoA thioesterase 5
11872	870	1.6	0.356667	-2.16542	Down	0.995606	Art2b	ADP-ribosyltransferase 2b
21835	1124	26.04	5.47333	-2.25024	Down	0.995647	Thrsp	thyroid hormone responsive
13237	410	2.66	0.48	-2.47032	Down	0.968492	Defa3	defensin, alpha, 3
503491	419	1.96333	0.266667	-2.8802	Down	0.973653	Defa24	defensin, alpha, 24
97114	649	7.49	0.843333	-3.15079	Down	0.998957	Hist2h3c2	histone cluster 2, H3c2
106648	2157	1.06	0.0933333	-3.50553	Down	0.994834	Cyp4f15	cytochrome P450, family 4, subfamily f, polypeptide 15
100294660	424	3.39667	0.28	-3.60062	Down	0.98444	Defa2	defensin, alpha, 2
16204	510	1250.89	58.9633	-4.40699	Down	1	Fabp6	fatty acid binding protein 6, ileal (gastrotropin)
23957	1282	1.56	0.0366667	-5.41093	Down	0.99906	Nr0b2	nuclear receptor subfamily 0, group B, member 2
11806	988	18.6933	0.41	-5.51076	Down	0.998506	Apoa1	apolipoprotein A-I
50929	1088	1.95333	0.04	-5.60979	Down	0.995271	Il22	interleukin 22
497114	418	1.13	0.01	-6.82018	Down	1	Defa23	defensin, alpha, 23
66298	419	1.14	0.01	-6.83289	Down	1	Defa21	defensin, alpha, 21
665956	351	1.17667	0.01	-6.87856	Down	1	Gm7861	predicted gene 7861
382551	738	1.30667	0.01	-7.02975	Down	1	Cd300lh	CD300 molecule like family member D3
319166	558	1.72	0.01	-7.42626	Down	1	Hist1h2ae	histone cluster 1, H2ae
13239	421	1.75	0.01	-7.45121	Down	1	Defa5	defensin, alpha, 5
