# Supplementary material for: Two Strains of Lactobacilli Effectively Decrease the Colonization of VRE in a Mouse Model
Source: Front Cell Infect Microbiol. 2019 Jan 30;9:6. doi: 10.3389/fcimb.2019.00006 (PMC6363661; doi:10.3389/fcimb.2019.00006)
Supplement: Supplementary file 7 [file Table_3.xlsx]

## Sheet: Sheet1
Table S3. List of DEGs in Y7-4/PBS
GeneID	geneLength	Means-control	Means-y74	log2Ratio(y74/control)	Up-Down-Regulation(y74/control)	Probability	Symbol	Description
73385	3863	0.01	4.06667	8.6677	Up	0.928255	Fam177a	family with sequence similarity 177, member A
627914	4538	0.01	3.54	8.46761	Up	1	Gm14430	predicted gene 14430
57738	4007	0.393333	2.45	2.63896	Up	0.935964	Slc15a2	solute carrier family 15 (H+/peptide transporter), member 2
268451	3145	0.533333	2.70667	2.34341	Up	0.830985	Rab11fip4	RAB11 family interacting protein 4 (class II)
20293	537	0.493333	2.06667	2.06667	Up	0.829593	Ccl12	chemokine (C-C motif) ligand 12
16554	5603	1.13333	4.26	1.91028	Up	0.806904	Kif13b	kinesin family member 13B
54608	2903	6.69	23.95	1.83995	Up	0.847683	Abhd2	abhydrolase domain containing 2
105243	2490	15.6967	53.0533	1.75699	Up	0.826645	Slc9a3	solute carrier family 9 (sodium/hydrogen exchanger), member 3
319192	596	2.62667	8.83333	1.74972	Up	0.865241	Hist2h2aa2	histone cluster 2, H2aa2
319179	954.95	0.613333	1.77	1.52901	Up	0.818001	Hist1h2be	histone cluster 1, H2be
69809	1318	0.55	1.39667	1.34448	Up	0.865235	1810046K07Rik	RIKEN cDNA 1810046K07 gene
11752	1892	5.42667	12.7467	1.23198	Up	0.847786	Anxa8	annexin A8
12265	5263.8	0.556667	1.22	1.132	Up	0.849239	Ciita	class II transactivator
20289	1136	1.05667	2.27	1.10317	Up	0.872239	Scx	scleraxis
381043	520	0.656667	1.40333	1.09562	Up	0.850226	Gm933	predicted gene 933
15405	3210.06	4.82	10.2133	1.08335	Up	0.84081	Hoxa9	homeobox A9
102022	1964	50.2767	105.017	1.06266	Up	1	Ces2a	carboxylesterase 2A
12309	480	61.97	128.847	1.05601	Up	0.83973	S100g	S100 calcium binding protein G
19337	1183	0.583333	1.18	1.01639	Up	0.858493	Rab33a	RAB33A, member RAS oncogene family
219033	695	473.71	950.363	1.00448	Up	0.858308	Ang4	angiogenin, ribonuclease A family, member 4
14396	3727	1.43333	0.713333	-1.00673	Down	0.899651	Gabra3	gamma-aminobutyric acid (GABA) A receptor, subunit alpha 3
76574	2166	3.47333	1.72333	-1.01112	Down	0.928453	Mfsd2a	major facilitator superfamily domain containing 2A
195733	3100	1.47333	0.716667	-1.03971	Down	0.916313	Grhl1	grainyhead-like 1 (Drosophila)
22370	1763	2.75667	1.32667	-1.05512	Down	0.918196	Vtn	vitronectin
57264	616.63	21.2533	10.07	-1.07763	Down	0.898605	Retn	resistin
100039781	936	2.11667	0.996667	-1.08661	Down	0.912083	Hrct1	histidine rich carboxyl terminus 1
69888	1630	3.12333	1.46667	-1.09055	Down	0.8808	Cyp2c66	cytochrome P450, family 2, subfamily c, polypeptide 66
70967	2045	1.16333	0.543333	-1.09836	Down	0.916753	Eva1c	eva-1 homolog C (C. elegans)
246049	2431	1.43	0.666667	-1.10098	Down	0.830084	Slc36a2	solute carrier family 36 (proton/amino acid symporter), member 2
218103	2974	1.06667	0.496667	-1.10276	Down	0.918018	Slc17a2	solute carrier family 17 (sodium phosphate), member 2
16176	1348	1.12667	0.52	-1.11548	Down	0.882287	Il1b	interleukin 1 beta
227231	5585	2.04	0.94	-1.11784	Down	0.92608	Cps1	carbamoyl-phosphate synthetase 1
574437	1636	2.14333	0.97	-1.1438	Down	0.834424	Xlr3b	X-linked lymphocyte-regulated 3B
14461	3258	1.31333	0.59	-1.15445	Down	0.910097	Gata2	GATA binding protein 2
232975	3609	3.01333	1.34333	-1.16554	Down	0.903519	Atp1a3	ATPase, Na+/K+ transporting, alpha 3 polypeptide
77037	992	2.95667	1.31333	-1.17074	Down	0.827467	Mrap	melanocortin 2 receptor accessory protein
107221	1393	31.1933	13.8233	-1.17413	Down	0.892016	Ffar4	free fatty acid receptor 4
12702	2742	11.6533	5.15	-1.1781	Down	0.908946	Socs3	suppressor of cytokine signaling 3
12738	3079	116.493	50.9767	-1.19234	Down	0.915035	Cldn2	claudin 2
237858	3237	1.08	0.47	-1.2003	Down	0.8782	Tusc5	tumor suppressor candidate 5
16790	3439	16.78	7.27667	-1.20539	Down	0.917593	Anpep	alanyl (membrane) aminopeptidase
103968	1900.35	4.52333	1.95	-1.21391	Down	0.857446	Plin1	perilipin 1
13874	4136	4.83333	2.02333	-1.25628	Down	0.892578	Ereg	epiregulin
29867	1001	1.06	0.44	-1.26849	Down	0.912208	Cabp1	calcium binding protein 1
319942	2636	1.25333	0.51	-1.2972	Down	0.816894	A530016L24Rik	RIKEN cDNA A530016L24 gene
14584	2986	2.36667	0.95	-1.31686	Down	0.910424	Gfpt2	glutamine fructose-6-phosphate transaminase 2
21835	1124	26.04	10.2967	-1.33855	Down	0.910879	Thrsp	thyroid hormone responsive
17393	1046.14	1.86	0.726667	-1.35594	Down	0.91023	Mmp7	matrix metallopeptidase 7
11537	925.16	101.467	39.3667	-1.36596	Down	0.916965	Cfd	complement factor D (adipsin)
116939	4649	2.36333	0.913333	-1.37161	Down	0.916536	Pnpla3	patatin-like phospholipase domain containing 3
14313	2620.94	5.8	2.23667	-1.3747	Down	0.896482	Fst	follistatin
19064	480	1.74667	0.64	-1.44846	Down	0.926018	Ppy	pancreatic polypeptide
75697	1348	21.9567	7.84667	-1.48451	Down	0.911175	C2cd4b	C2 calcium-dependent domain containing 4B
106648	2157	1.06	0.346667	-1.61244	Down	0.880718	Cyp4f15	cytochrome P450, family 4, subfamily f, polypeptide 15
20454	2289.64	13.31	4.32667	-1.62118	Down	0.91637	St3gal5	ST3 beta-galactoside alpha-2,3-sialyltransferase 5
56857	4440	29.7433	9.55333	-1.63849	Down	0.923184	Slc37a2	solute carrier family 37 (glycerol-3-phosphate transporter), member 2
69699	879	1.21	0.38	-1.67094	Down	0.915197	2310079G19Rik	RIKEN cDNA 2310079G19 gene
68662	540	1.18667	0.356667	-1.73427	Down	0.878206	Scgb3a1	secretoglobin, family 3A, member 1
18741	1885.51	10.66	3.13333	-1.76644	Down	0.917822	Pitx2	paired-like homeodomain transcription factor 2
668039	4538	1.45333	0.413333	-1.81399	Down	0.887041	Gm14434	predicted gene 14434
100043915	4538	1.45333	0.413333	-1.81399	Down	0.887041	Gm4724	predicted gene 4724
100043381	4538	1.45333	0.413333	-1.81399	Down	0.887041	Gm14308	predicted gene 14308
393082	1808	1.26667	0.36	-1.81497	Down	0.905065	Mettl7a2	methyltransferase like 7A2
246747	665	2.92333	0.803333	-1.86354	Down	0.909828	Adig	adipogenin
217698	1518	1.96667	0.533333	-1.88264	Down	0.898788	Acot5	acyl-CoA thioesterase 5
100039257	1447	97.5267	23.96	-2.02517	Down	0.902318	Tmem254b	transmembrane protein 254b
67715	1257	1.13333	0.263333	-2.10561	Down	0.90796	2010106E10Rik	RIKEN cDNA 2010106E10 gene
108017	551	1.56333	0.346667	-2.173	Down	0.92459	Fxyd4	FXYD domain-containing ion transport regulator 4
16204	510	1250.89	202.67	-2.62575	Down	0.876732	Fabp6	fatty acid binding protein 6, ileal (gastrotropin)
503491	419	1.96333	0.266667	-2.8802	Down	0.909598	Defa24	defensin, alpha, 24
13237	410	2.66	0.293333	-3.18081	Down	0.916438	Defa3	defensin, alpha, 3
50929	1088	1.95333	0.17	-3.52233	Down	0.888471	Il22	interleukin 22
23957	1282	1.56	0.116667	-3.74108	Down	0.847604	Nr0b2	nuclear receptor subfamily 0, group B, member 2
11806	988	18.6933	0.376667	-5.63309	Down	0.927114	Apoa1	apolipoprotein A-I
497114	418	1.13	0.01	-6.82018	Down	0.949541	Defa23	defensin, alpha, 23
66298	419	1.14	0.01	-6.83289	Down	0.955334	Defa21	defensin, alpha, 21
665956	351	1.17667	0.01	-6.87856	Down	0.95724	Gm7861	predicted gene 7861
13239	421	1.75	0.01	-7.45121	Down	1	Defa5	defensin, alpha, 5
15077	664	2.35667	0.01	-7.8806	Down	0.993658	Hist2h3c1	histone cluster 2, H3c1
100294660	424	3.39667	0.01	-8.40798	Down	1	Defa2	defensin, alpha, 2
